# Supplementary material
Source: Elsevier journal article supplement (https://rcastoragev2.blob.core.windows.net/c92288d1ed1be726f26123668bc8989e/mmc1.pdf)
Supplement: mmc1 [file mmc1.pdf]

## Supplemental Information

### ***E. coli* SbcCD and RecA Control Chromosomal Rearrangement Induced by an Interrupted Palindrome**

**Elise Darmon, John K. Eykelenboom, Frédéric Lincker, Lucy H. Jones, Martin White, Ewa Okely, John K. Blackwood, and David R. Leach**

#### Supplemental Experimental Procedures

##### *DNA techniques*

Procedures for DNA purification, agarose gel electrophoresis and transformation of competent *E. coli* cells were carried out as described by Sambrook *et al.* (Sambrook et al., 1989). Enzymes were from New England Biolabs, Roche Molecular Biochemicals or Promega Life Science. Reactions were carried out according to manufacturer's instructions.

The pTOFmhpREcoRI plasmid was used to introduce an EcoRI cleavage site into the *mhpR* gene. Two amplified fragments in the *mhpR* region were ligated, after PCR-mediated coupling, into the chromosomal integration and excision plasmid pTOF24. The upstream fragment of 463bp was amplified from *E. coli* MG1655 using primers 2DEcoRI-F1 and 2DEcoRI-R1. The downstream fragment of 430bp was amplified from *E. coli* MG1655 using primers 2DEcoRI-F2 and 2DEcoRI-R2. Notably, primers 2DEcoRI-R1 and 2DEcoRI-F2 permitted the introduction of a unique EcoRI restriction site at the centre of the PCR-mediated coupling of these two PCR fragments. This 865bp final PCR product was cloned between the PstI and SalI sites of plasmid pTOF24, resulting in the kanamycin sensitive pTOFmhpREcoRI plasmid.

The pDL2038 plasmid was used to introduce an 85bp palindrome into the *lacZ* gene. A 513bp fragment containing the 85bp palindrome was amplified by PCR, using primers pal-CF2 and pal-CR1 and the KOD polymerase (Novagen), from the bacteriophage  $\lambda$  containing del85 isolated by Pinder and collaborators (Pinder et al., 1998). The 85bp palindrome was excised by digestion with EcoRI and cloned into the MfeI restriction site of the chromosomal integration and excision plasmid pLacD1, resulting in the kanamycin sensitive pDL2038 plasmid. The presence of the palindrome in the plasmid was verified by PCR using primers lac-SF1 and seq-SR1.

The pTOF<cynXhomol> plasmid was used to remove the *tetO* array [240x*tetO*(Gm<sup>R</sup>)] from the *cynX* gene. A fragment of 974bp was amplified by PCR from the *E. coli* chromosome using primers TetO-CF1 and TetO-CR2. This fragment was digested by PstI and NheI restriction enzymes and cloned between the PstI and XbaI sites of the chromosomal integration and excision plasmid pTOF24, resulting in the kanamycin sensitive pTOF<cynXhomol> plasmid.

The pTOFruvC plasmid was used to introduce an in-frame deletion of the *ruvC* gene. Two amplified fragments in the *ruvC* region were ligated, after PCR-mediated coupling, into the pTOF24 plasmid. The 429bp-upstream fragment and the 439bp-downstream fragment were amplified from *E. coli* MG1655 using primer pairs *ruvC*-KO-F1/*ruvC*-KO-R1 and *ruvC*-KO-F2/*ruvC*-KO-R2, respectively. The 844bp PCR-mediated coupling of these two fragments was cloned between the PstI and SalI sites of plasmid pTOF24, resulting in the kanamycin sensitive pTOFruvC plasmid.

The pTOFrecD plasmid was used to introduce an in-frame deletion of the *recD* gene. Two amplified fragments in the *recD* region were ligated, after PCR-mediated coupling, into the pTOF24 plasmid. The 458bp-upstream fragment and the 472bp-downstream fragment were amplified from *E. coli* MG1655 using primer pairs *recD*-KO-F1/*recD*-KO-R1 and *recD*-KO-

F2/recD-KO-R2, respectively. The 906bp PCR-mediated coupling of these two fragments was cloned between the PstI and SalI sites of plasmid pTOF24, resulting in the kanamycin sensitive pTOFrecD plasmid.

The pTOFsbcB plasmid was used to introduce an in-frame deletion of the *sbcB* gene. Two amplified fragments in the *sbcB* region were ligated, after PCR-mediated coupling, into the pTOF24 plasmid. The 466bp-upstream fragment and the 438bp-downstream fragment were amplified from *E. coli* MG1655 using primer pairs sbcB-KO-F1/sbcB-KO-R1 and sbcB-KO-F2/sbcB-KO-R2, respectively. The 880bp PCR-mediated coupling of these two fragments was cloned between the PstI and SalI sites of plasmid pTOF24, resulting in the kanamycin sensitive pTOFsbcB plasmid.

The pTOFrecB plasmid was used to introduce an in-frame deletion of the *recB* gene. Two amplified fragments in the *recB* region were ligated, after PCR-mediated coupling, into the pTOF24 plasmid. The 446bp-upstream fragment and the 460bp-downstream fragment were amplified from *E. coli* MG1655 using primer pairs recB-KO-F1/recB-KO-R1 and recB-KO-F2/recB-KO-R2, respectively. The 882bp PCR-mediated coupling of these two fragments was cloned between the PstI and SalI sites of plasmid pTOF24, resulting in the kanamycin sensitive pTOFrecB plasmid.

The pYaiOIsceI plasmid was used to introduce an I-SceI cleavage site into the *yaiO* gene. Two amplified fragments in the *yaiO* region were ligated, after PCR-mediated coupling, into the pTOF24 plasmid. The 436bp-upstream fragment and the 402bp-downstream fragment were amplified from *E. coli* MG1655 using primer pairs yaiO1/yaiO2 and yaiO3/yaiO4, respectively. Notably, primers yaiO2 and yaiO3 added an I-SceI restriction site between the two fragments. The 820bp PCR-mediated coupling of these two fragments was cloned between

the PstI and SalI sites of plasmid pTOF24, resulting in the kanamycin sensitive pYaiOIscel plasmid.

In order to introduce a mutation using a derivative of the pTOF24 or pLacD1 plasmid, the specific thermosensitive plasmid was introduced into the *E. coli* chromosome of the original strain with selection for chloramphenicol resistance. Then, an allele replacement by chromosomal integration and excision was carried out as described by Merlin and collaborators (Merlin et al., 2002). Correct insertion of the mutation was verified by PCR using external primers (or primers Ex-test-F and Ex-test-R for a palindrome). If applicable, the insertion of a restriction site was checked by restriction of the PCR product or deletions were verified by UV sensitivity test.

Specific mutations were transferred into the desired receiving strains using the P1 transduction technique with selection for the appropriate antibiotic resistance (Miller J.H., 1992). When applicable, the presence of the palindrome was verified by PCR using primers Ex-test-F and Ex-test-R. In order to do the P1 transduction into the MG1655 *lacZ $\chi$ - lacI<sup>q</sup> lacZ::pal246 cynX::Gm<sup>r</sup>  $\Delta$ sbcDC mhpR(EcoRI)  $\Delta$ recB (DL4116)* strain, the pAM-RecBCD+ plasmid was transiently used to make this strain recombination proficient.

### ***Fluorescence microscopy***

Images were acquired at a resolution of 0.129 $\mu$ m per pixel using a Zeiss Axiovert 200 fluorescence microscope equipped with a Photometrics cool-SNAP HQ CCD camera. Stacks of optical section images of CFP and YFP fluorescence were collected and deconvolved using the Autovisualize + Autodeblur program (3D adaptative PSF (blind) deconvolution), then analysed and pseudocoloured using the MetaMorph 6-3r2 program (Molecular Devices).

### ***Plasmids, bacterial strains, primers and media***

Bacteria were grown at 37°C under agitation in either LB (1% Bactotryptone, 0.5% Bacto yeast extract, 0.5% NaCl and 2mM NaOH) or M9 medium (50mM Na<sub>2</sub>HPO<sub>4</sub>, 22mM KH<sub>2</sub>PO<sub>4</sub>, 8.5mM NaCl and 2mM NH<sub>4</sub>Cl, supplemented with 0.02mM CaCl<sub>2</sub>, 1mM MgSO<sub>4</sub>). Antibiotics were used at the following concentrations: ampicillin (Amp), 100mg/l; chloramphenicol (Cm), 50mg/l; gentamicin (Gm), 10mg/l and kanamycin (Km), 50mg/l. IPTG was used at 0.28mM. Sucrose was used a 5%, glucose at 0.5% and arabinose at 0.2%.

**Plasmids, bacterial strains and primers.** Ts indicates that the plasmid has a temperature-sensitive origin of replication. *lacZ* $\chi$ - indicates that a *chi* sequence situated at 2230bp in the *lacZ* gene was removed. Restriction sites used for cloning are underlined and sequences required for the PCR-mediated coupling are indicated in bold letters.

| <b>Plasmids</b> | <b>Relevant properties</b>                                                                                                                                                                             | <b>References or construction</b> |
|-----------------|--------------------------------------------------------------------------------------------------------------------------------------------------------------------------------------------------------|-----------------------------------|
| pAM-recBCD+     | pAM34 derivative plasmid containing the <i>recBCD</i> genes under the control of a constitutive promoter; IPTG, Amp <sup>R</sup>                                                                       | Gift from Benedicte Michel        |
| pDL2038         | pLacD1 derivative containing an 85bp palindrome; Cm <sup>r</sup> , Ts, Suc <sup>s</sup>                                                                                                                | This work                         |
| pDL2736         | pTOF24 derivative containing two fused PCR fragments from the <i>proA</i> region, separated by an I-SceI restriction site, in the place of the <i>aph</i> gene; Cm <sup>r</sup> , Ts, Suc <sup>s</sup> | (Eykelboom et al., 2008)          |
| pDL2755         | pTOF24 derivative containing two fused PCR fragments from the <i>tsx</i> region, separated by an I-SceI restriction site, in the place of the <i>aph</i> gene; Cm <sup>r</sup> , Ts, Suc <sup>s</sup>  | (Eykelboom et al., 2008)          |
| pDL2774         | pLacD1 derivative containing a 246bp palindrome; Cm <sup>r</sup> , Ts, Suc <sup>s</sup>                                                                                                                | (Eykelboom et al., 2008)          |
| pDL3196         | <i>lacI-cfp</i> (cerulean) and <i>tetR-yfp</i> under a weak constitutive promoter (P <sub>ftsKi</sub> ); Amp <sup>R</sup>                                                                              | (White et al., 2008)              |

|                 |                                                                                                                                                                                                                                                                              |                          |
|-----------------|------------------------------------------------------------------------------------------------------------------------------------------------------------------------------------------------------------------------------------------------------------------------------|--------------------------|
| pLacD1          | pTOF24 derivative containing two fused PCR fragments from the <i>lacZ</i> region, the L8 mutation and in which the <i>BsaI</i> , <i>MfeI</i> , and <i>BbsI</i> restriction sites were moved to the beginning of the <i>lacZ</i> gene; Cm <sup>r</sup> , Ts, Suc <sup>s</sup> | (Zahra et al., 2007)     |
| pTOF24          | pSC101-based vector; <i>repA</i> (Ts) with a <i>sacB</i> gene conferring sucrose sensitivity and <i>aph</i> from pUC4K; Cm <sup>r</sup> , Km <sup>r</sup> , Ts, Suc <sup>s</sup>                                                                                             | (Merlin et al., 2002)    |
| pTOF<cynXhomol> | pTOF24 derivative containing a PCR fragment from the <i>cynX</i> region in the place of the <i>aph</i> gene; Cm <sup>r</sup> , Ts, Suc <sup>s</sup>                                                                                                                          | This work                |
| pTOFmhpREcoRI   | pTOF24 derivative containing two fused PCR fragments, from the <i>mhpR</i> region, separated by an EcoRI restriction site, in the place of the <i>aph</i> gene; Cm <sup>r</sup> , Ts, Suc <sup>s</sup>                                                                       | This work                |
| pTOFrecB        | pTOF24 derivative containing two fused PCR fragments, homologous to upstream and downstream regions of <i>recB</i> , in the place of the <i>aph</i> gene; Cm <sup>r</sup> , Ts, Suc <sup>s</sup>                                                                             | This work                |
| pTOFrecD        | pTOF24 derivative containing two fused PCR fragments, homologous to upstream and downstream regions of <i>recD</i> , in the place of the <i>aph</i> gene; Cm <sup>r</sup> , Ts, Suc <sup>s</sup>                                                                             | This work                |
| pTOFruvAB       | pTOF24 derivative containing two fused PCR fragments, homologous to upstream and downstream regions of the <i>ruvAB</i> operon, in the place of the <i>aph</i> gene; Cm <sup>r</sup> , Ts, Suc <sup>s</sup>                                                                  | (Eykelboom et al., 2008) |
| pTOFruvC        | pTOF24 derivative containing two fused PCR fragments, homologous to upstream and downstream regions of <i>ruvC</i> , in the place of the <i>aph</i> gene; Cm <sup>r</sup> , Ts, Suc <sup>s</sup>                                                                             | This work                |
| pTOFsbcB        | pTOF24 derivative containing two fused PCR fragments, homologous to upstream and downstream regions of <i>sbcB</i> , in the place of the <i>aph</i> gene; Cm <sup>r</sup> , Ts, Suc <sup>s</sup>                                                                             | This work                |
| pTOFsbcDC       | pTOF24 derivative containing two fused PCR fragments, homologous to upstream and downstream regions of <i>sbcDC</i> operon, in the place of the <i>aph</i> gene; Cm <sup>r</sup> , Ts, Suc <sup>s</sup>                                                                      | (Darmon et al., 2007)    |
| pYaiOIscel      | pTOF24 derivative containing two fused PCR fragments from the <i>yaiO</i> region, separated by an I-SceI restriction site, in the place of the <i>aph</i> gene; Cm <sup>r</sup> , Ts, Suc <sup>s</sup>                                                                       | This work                |

| Strains        |                                                                                                                                                                                |                                       |
|----------------|--------------------------------------------------------------------------------------------------------------------------------------------------------------------------------|---------------------------------------|
| <i>E. coli</i> |                                                                                                                                                                                |                                       |
| BW27784        | <i>lacI<sup>q</sup> rrnB3ΔlacZ4787 hsdR514 DE(araBAD)567</i>                                                                                                                   | (Khlebnikov et al., 2001)             |
| DB1318         | <i>DE(rhaBAD)568 DE(araFGH) Φ(ΔaraEp P<sub>CP18</sub>-araE) recD1014 hsdR<sub>2</sub> Zgq-202::Tn10 recA::cat</i>                                                              | (Wertman et al., 1986)                |
| DL1777         | MG1655 <i>lacZχ<sup>-</sup> lacI<sup>q</sup></i>                                                                                                                               | (Eykelboom et al., 2008)              |
| DL2006         | BW27784 <i>lacZχ<sup>-</sup> lacI<sup>q</sup> P<sub>araBAD</sub>-sbcDC lacZ::pal246 cynX::Gm<sup>r</sup></i>                                                                   | (Eykelboom et al., 2008)              |
| DL2151         | MG1655 <i>lacZχ<sup>-</sup> lacI<sup>q</sup> ΔsbcDC</i>                                                                                                                        | (Eykelboom et al., 2008)              |
| DL2792         | BW27784 <i>P<sub>araBAD</sub>-sbcDC cynX::GmR tsx::I-SceI<sub>cs</sub> proA::I-SceI<sub>cs</sub></i>                                                                           | (Eykelboom et al., 2008)              |
| DL2849         | BW27784 <i>P<sub>araBAD</sub>-sbcDC cynX::GmR tsx::I-SceI<sub>cs</sub> proA::I-SceI<sub>cs</sub> lacZ::I-SceI<sub>cs</sub></i>                                                 | (Eykelboom et al., 2008)              |
| DL2874         | MG1655 <i>lacZχ<sup>-</sup> lacI<sup>q</sup> lacZ::pal246 cynX::Gm<sup>r</sup> ΔsbcDC</i>                                                                                      | (Eykelboom et al., 2008)              |
| DL2894         | BW27784 <i>lacZ<sup>+</sup> lacZχ<sup>-</sup> lacI<sup>q</sup> cynX::[240xtetO(Gm<sup>R</sup>)] araB::P<sub>araBAD</sub>-I-sceI</i>                                            | (White et al., 2008)                  |
| DL2988         | BW27784 <i>lacZ<sup>+</sup> lacZχ<sup>-</sup> lacI<sup>q</sup> araB::P<sub>araBAD</sub>-I-sceI</i>                                                                             | DL2894 mutated using pTOF<cynXho mol> |
| DL3279         | BW27784 <i>lacZ<sup>+</sup> lacZχ<sup>-</sup> ΔlacI mhpA::χχχ lacZY::χχχ araB::P<sub>araBAD</sub>-I-sceI cynX::[240xtetO(Gm<sup>R</sup>)] mhpC::[240xlacO(Km<sup>R</sup>)]</i> | (White et al., 2008)                  |
| DL3325         | MG1655 <i>lacZχ<sup>-</sup> lacI<sup>q</sup> ΔsbcDC mhpR(EcoRI)</i>                                                                                                            | DL2151 mutated using pTOFmhpREcoRI    |
| DL3326         | MG1655 <i>lacZχ<sup>-</sup> lacI<sup>q</sup> lacZ::pal246 cynX::Gm<sup>r</sup> ΔsbcDC mhpR(EcoRI)</i>                                                                          | DL2874 mutated using                  |

|        |                                                                                                                                                                                                                   |                                        |
|--------|-------------------------------------------------------------------------------------------------------------------------------------------------------------------------------------------------------------------|----------------------------------------|
|        |                                                                                                                                                                                                                   | pTOFmhpREc<br>oRI                      |
| DL3395 | MG1655 <i>lacZ</i> $\chi^-$ <i>lacI</i> <sup>q</sup> $\Delta$ <i>sbcDC</i> <i>mhpR</i> (EcoRI) <i>recA</i> ::Cm                                                                                                   | DL3325<br>mutated by P1<br>from DB1318 |
| DL3396 | MG1655 <i>lacZ</i> $\chi^-$ <i>lacI</i> <sup>q</sup> <i>lacZ</i> ::pal246 <i>cynX</i> ::Gm <sup>r</sup> $\Delta$ <i>sbcDC</i> <i>mhpR</i> (EcoRI) <i>recA</i> ::Cm                                                | DL3326<br>mutated by P1<br>from DB1318 |
| DL3752 | MG1655 <i>lacZ</i> $\chi^-$ <i>lacI</i> <sup>q</sup> <i>lacZ</i> ::pal246 <i>cynX</i> ::Gm <sup>r</sup> $\Delta$ <i>sbcDC</i> <i>mhpR</i> (EcoRI) $\Delta$ <i>ruvAB</i>                                           | DL3326<br>mutated using<br>pTOFruvAB   |
| DL3753 | MG1655 <i>lacZ</i> $\chi^-$ <i>lacI</i> <sup>q</sup> <i>lacZ</i> ::pal246 <i>cynX</i> ::Gm <sup>r</sup> $\Delta$ <i>sbcDC</i> <i>mhpR</i> (EcoRI) $\Delta$ <i>ruvAB</i> <i>recA</i> :: <i>cat</i>                 | DL3752<br>mutated by P1<br>from DB1318 |
| DL3754 | MG1655 <i>lacZ</i> $\chi^-$ <i>lacI</i> <sup>q</sup> <i>lacZ</i> ::pal246 <i>cynX</i> ::Gm <sup>r</sup> $\Delta$ <i>sbcDC</i> <i>mhpR</i> (EcoRI) $\Delta$ <i>ruvC</i>                                            | DL3326<br>mutated using<br>pTOFruvC    |
| DL3755 | MG1655 <i>lacZ</i> $\chi^-$ <i>lacI</i> <sup>q</sup> <i>lacZ</i> ::pal246 <i>cynX</i> ::Gm <sup>r</sup> $\Delta$ <i>sbcDC</i> <i>mhpR</i> (EcoRI) $\Delta$ <i>ruvC</i> <i>recA</i> :: <i>cat</i>                  | DL3754<br>mutated by P1<br>from DB1318 |
| DL3804 | MG1655 <i>lacZ</i> $\chi^-$ <i>lacI</i> <sup>q</sup> <i>lacZ</i> ::pal246 <i>cynX</i> ::Gm <sup>r</sup> $\Delta$ <i>sbcDC</i> <i>mhpR</i> (EcoRI) $\Delta$ <i>recG263</i> :: <i>kan</i>                           | DL3326<br>mutated by P1<br>from N3793  |
| DL3810 | MG1655 <i>lacZ</i> $\chi^-$ <i>lacI</i> <sup>q</sup> <i>lacZ</i> ::pal246 <i>cynX</i> ::Gm <sup>r</sup> $\Delta$ <i>sbcDC</i> <i>mhpR</i> (EcoRI) $\Delta$ <i>recG263</i> :: <i>kan</i> <i>recA</i> :: <i>cat</i> | DL3804<br>mutated by P1<br>from DB1318 |
| DL3812 | MG1655 <i>lacZ</i> $\chi^-$ <i>lacI</i> <sup>q</sup> <i>lacZ</i> ::pal246 <i>cynX</i> ::Gm <sup>r</sup> $\Delta$ <i>sbcDC</i> <i>mhpR</i> (EcoRI) $\Delta$ <i>sbcB</i>                                            | DL3326<br>mutated using<br>pTOFsbcB    |
| DL3827 | MG1655 <i>lacZ</i> $\chi^-$ <i>lacI</i> <sup>q</sup> <i>lacZ</i> ::pal246 <i>cynX</i> ::Gm <sup>r</sup> $\Delta$ <i>sbcDC</i> <i>mhpR</i> (EcoRI) $\Delta$ <i>sbcB</i> <i>recA</i> :: <i>cat</i>                  | DL3812<br>mutated by P1<br>from DB1318 |
| DL3828 | BW27784 <i>lacZ</i> <sup>+</sup> <i>lacZ</i> $\chi^-$ <i>lacI</i> <sup>q</sup> <i>araB</i> ::P <sub>araBAD</sub> - <i>I-sceI</i> $\Delta$ <i>sbcDC</i>                                                            | DL2988                                 |

---

|        |                                                                                                                                                                                                                                                                                                                    |                              |
|--------|--------------------------------------------------------------------------------------------------------------------------------------------------------------------------------------------------------------------------------------------------------------------------------------------------------------------|------------------------------|
|        |                                                                                                                                                                                                                                                                                                                    | mutated using<br>pTOFsbcDC   |
| DL3835 | MG1655 <i>lacZ</i> $\chi^-$ <i>lacI</i> <sup>q</sup> $\Delta$ <i>sbcDC</i> <i>lacZ</i> ::pal85                                                                                                                                                                                                                     | DL2151                       |
|        |                                                                                                                                                                                                                                                                                                                    | mutated using<br>pDL2038     |
| DL3845 | BW27784 <i>lacZ</i> <sup>+</sup> <i>lacZ</i> $\chi^-$ <i>lacI</i> <sup>q</sup> <i>araB</i> ::P <sub><i>araBAD</i></sub> - <i>I-sceI</i> $\Delta$ <i>sbcDC</i><br><i>yaiO</i> ::I-SceI <sub>cs</sub>                                                                                                                | DL3828                       |
|        |                                                                                                                                                                                                                                                                                                                    | mutated using<br>pYaiOIscel  |
| DL3846 | MG1655 <i>lacZ</i> $\chi^-$ <i>lacI</i> <sup>q</sup> <i>lacZ</i> ::pal85                                                                                                                                                                                                                                           | DL1777                       |
|        |                                                                                                                                                                                                                                                                                                                    | mutated using<br>pDL2038     |
| DL3853 | BW27784 <i>lacZ</i> <sup>+</sup> <i>lacZ</i> $\chi^-$ $\Delta$ <i>lacI</i> <i>mhpA</i> :: $\chi\chi\chi$ <i>lacZY</i> :: $\chi\chi\chi$<br><i>araB</i> ::P <sub><i>araBAD</i></sub> - <i>I-sceI</i> <i>cynX</i> ::[240xtetO(Gm <sup>R</sup> )]<br><i>mhpC</i> ::[240xlacO(Km <sup>R</sup> )] $\Delta$ <i>sbcDC</i> | DL3279                       |
|        |                                                                                                                                                                                                                                                                                                                    | mutated using<br>pTOFsbcDC   |
| DL3856 | MG1655 <i>lacZ</i> $\chi^-$ <i>lacI</i> <sup>q</sup> $\Delta$ <i>sbcDC</i> <i>lacZ</i> ::pal85 <i>recA</i> ::Cm                                                                                                                                                                                                    | DL3835                       |
|        |                                                                                                                                                                                                                                                                                                                    | mutated by P1<br>from DB1318 |
| DL3857 | MG1655 <i>lacZ</i> $\chi^-$ <i>lacI</i> <sup>q</sup> <i>lacZ</i> ::pal85 <i>recA</i> ::Cm                                                                                                                                                                                                                          | DL3846                       |
|        |                                                                                                                                                                                                                                                                                                                    | mutated by P1<br>from DB1318 |
| DL3860 | BW27784 <i>lacZ</i> <sup>+</sup> <i>lacZ</i> $\chi^-$ <i>lacI</i> <sup>q</sup> <i>araB</i> ::P <sub><i>araBAD</i></sub> - <i>I-sceI</i> $\Delta$ <i>sbcDC</i><br><i>yaiO</i> ::I-SceI <sub>cs</sub> <i>lacZ</i> ::pal246 <i>cynX</i> ::Gm <sup>r</sup>                                                             | DL3845                       |
|        |                                                                                                                                                                                                                                                                                                                    | mutated by P1<br>from DL2006 |
| DL3867 | MG1655 <i>lacZ</i> $\chi^-$ <i>lacI</i> <sup>q</sup> <i>lacZ</i> ::pal246 <i>cynX</i> ::Gm <sup>r</sup> $\Delta$ <i>sbcDC</i><br><i>mhpR</i> (EcoRI) $\Delta$ <i>recD</i>                                                                                                                                          | DL3326                       |
|        |                                                                                                                                                                                                                                                                                                                    | mutated using<br>pTOFrecD    |
| DL3870 | BW27784 <i>lacZ</i> <sup>+</sup> <i>lacZ</i> $\chi^-$ <i>lacI</i> <sup>q</sup> <i>araB</i> ::P <sub><i>araBAD</i></sub> - <i>I-sceI</i> $\Delta$ <i>sbcDC</i><br><i>yaiO</i> ::I-SceI <sub>cs</sub> <i>lacZ</i> ::pal246 <i>cynX</i> ::Gm <sup>r</sup> <i>recA</i> ::Cm                                            | DL3860                       |
|        |                                                                                                                                                                                                                                                                                                                    | mutated by P1<br>from DB1318 |
| DL3876 | MG1655 <i>lacZ</i> $\chi^-$ <i>lacI</i> <sup>q</sup> <i>lacZ</i> ::pal246 <i>cynX</i> ::Gm <sup>r</sup> $\Delta$ <i>sbcDC</i><br><i>mhpR</i> (EcoRI) $\Delta$ <i>recD</i> <i>recA</i> ::cat                                                                                                                        | DL3867                       |
|        |                                                                                                                                                                                                                                                                                                                    | mutated by P1<br>from DB1318 |
| DL4116 | MG1655 <i>lacZ</i> $\chi^-$ <i>lacI</i> <sup>q</sup> <i>lacZ</i> ::pal246 <i>cynX</i> ::Gm <sup>r</sup> $\Delta$ <i>sbcDC</i><br><i>mhpR</i> (EcoRI) $\Delta$ <i>recB</i>                                                                                                                                          | DL3326                       |
|        |                                                                                                                                                                                                                                                                                                                    | mutated using<br>pTOFrecB    |

---

|        |                                                                                                                                                                                                                                                                                                                                                                           |                                        |
|--------|---------------------------------------------------------------------------------------------------------------------------------------------------------------------------------------------------------------------------------------------------------------------------------------------------------------------------------------------------------------------------|----------------------------------------|
| DL4136 | MG1655 <i>lacZ</i> $\chi^-$ <i>lacI</i> <sup>q</sup> <i>lacZ</i> ::pal246 <i>cynX</i> ::Gm <sup>r</sup> $\Delta$ <i>sbcDC</i> <i>mhpR</i> (EcoRI) $\Delta$ <i>recB</i> <i>recA</i> :: <i>cat</i>                                                                                                                                                                          | DL4116<br>mutated by P1<br>from DB1318 |
| DL4200 | BW27784 <i>lacZ</i> <sup>+</sup> <i>lacZ</i> $\chi^-$ $\Delta$ <i>lacI</i> <i>mhpA</i> :: $\chi\chi\chi$ <i>lacZY</i> :: $\chi\chi\chi$ <i>araB</i> ::P <sub><i>araBAD</i></sub> - <i>I-sceI</i> <i>cynX</i> ::[240xtetO(Gm <sup>R</sup> )] <i>mhpC</i> ::[240xlacO(Km <sup>R</sup> )] $\Delta$ <i>sbcDC</i> <i>yaiO</i> ::I-SceI <sub>cs</sub>                           | DL3853<br>mutated using<br>pYaiOIscel  |
| DL4204 | BW27784 <i>lacZ</i> <sup>+</sup> <i>lacZ</i> $\chi^-$ $\Delta$ <i>lacI</i> <i>mhpA</i> :: $\chi\chi\chi$ <i>lacZY</i> :: $\chi\chi\chi$ <i>araB</i> ::P <sub><i>araBAD</i></sub> - <i>I-sceI</i> <i>cynX</i> ::[240xtetO(Gm <sup>R</sup> )] <i>mhpC</i> ::[240xlacO(Km <sup>R</sup> )] $\Delta$ <i>sbcDC</i> <i>yaiO</i> ::I-SceI <sub>cs</sub> <i>recA</i> :: <i>cat</i> | DL4200<br>mutated by P1<br>from DB1318 |
| DL4205 | BW27784 <i>lacZ</i> $\chi^-$ $\Delta$ <i>lacI</i> <i>mhpA</i> :: $\chi\chi\chi$ <i>lacZY</i> :: $\chi\chi\chi$ <i>araB</i> ::P <sub><i>araBAD</i></sub> - <i>I-sceI</i> <i>cynX</i> ::[240xtetO(Gm <sup>R</sup> )] <i>mhpC</i> ::[240xlacO(Km <sup>R</sup> )] $\Delta$ <i>sbcDC</i> <i>yaiO</i> ::I-SceI <sub>cs</sub> <i>lacZ</i> ::pal246                               | DL4200<br>mutated using<br>pDL2774     |
| DL4206 | BW27784 <i>lacZ</i> $\chi^-$ $\Delta$ <i>lacI</i> <i>mhpA</i> :: $\chi\chi\chi$ <i>lacZY</i> :: $\chi\chi\chi$ <i>araB</i> ::P <sub><i>araBAD</i></sub> - <i>I-sceI</i> <i>cynX</i> ::[240xtetO(Gm <sup>R</sup> )] <i>mhpC</i> ::[240xlacO(Km <sup>R</sup> )] $\Delta$ <i>sbcDC</i> <i>yaiO</i> ::I-SceI <sub>cs</sub> <i>lacZ</i> ::pal246 <i>recA</i> :: <i>cat</i>     | DL4205<br>mutated by P1<br>from DB1318 |
| DL4421 | MG1655 <i>lacZ</i> $\chi^-$ <i>lacI</i> <sup>q</sup> $\Delta$ <i>sbcDC</i> <i>mhpR</i> (EcoRI) <i>tsx</i> ::I-SceI <sub>cs</sub>                                                                                                                                                                                                                                          | DL3325<br>mutated using<br>pDL2755     |
| DL4422 | MG1655 <i>lacZ</i> $\chi^-$ <i>lacI</i> <sup>q</sup> <i>lacZ</i> ::pal246 <i>cynX</i> ::Gm <sup>r</sup> $\Delta$ <i>sbcDC</i> <i>mhpR</i> (EcoRI) <i>tsx</i> ::I-SceI <sub>cs</sub>                                                                                                                                                                                       | DL3326<br>mutated using<br>pDL2755     |
| DL4461 | MG1655 <i>lacZ</i> $\chi^-$ <i>lacI</i> <sup>q</sup> $\Delta$ <i>sbcDC</i> <i>mhpR</i> (EcoRI) <i>tsx</i> ::I-SceI <sub>cs</sub> <i>proA</i> ::I-SceI <sub>cs</sub>                                                                                                                                                                                                       | DL4421<br>mutated using<br>pDL2736     |
| DL4466 | MG1655 <i>lacZ</i> $\chi^-$ <i>lacI</i> <sup>q</sup> <i>lacZ</i> ::pal246 <i>cynX</i> ::Gm <sup>r</sup> $\Delta$ <i>sbcDC</i> <i>mhpR</i> (EcoRI) <i>tsx</i> ::I-SceI <sub>cs</sub> <i>proA</i> ::I-SceI <sub>cs</sub>                                                                                                                                                    | DL4422<br>mutated using<br>pDL2736     |
| DL4480 | MG1655 <i>lacZ</i> $\chi^-$ <i>lacI</i> <sup>q</sup> $\Delta$ <i>sbcDC</i> <i>mhpR</i> (EcoRI) <i>tsx</i> ::I-SceI <sub>cs</sub> <i>proA</i> ::I-SceI <sub>cs</sub> <i>recA</i> :: <i>cat</i>                                                                                                                                                                             | DL4461<br>mutated by P1<br>from DB1318 |
| DL4481 | MG1655 <i>lacZ</i> $\chi^-$ <i>lacI</i> <sup>q</sup> <i>lacZ</i> ::pal246 <i>cynX</i> ::Gm <sup>r</sup> $\Delta$ <i>sbcDC</i> <i>mhpR</i> (EcoRI) <i>tsx</i> ::I-SceI <sub>cs</sub> <i>proA</i> ::I-SceI <sub>cs</sub> <i>recA</i> :: <i>cat</i>                                                                                                                          | DL4466<br>mutated by P1<br>from DB1318 |

---

|        |                                                                                |                         |
|--------|--------------------------------------------------------------------------------|-------------------------|
| MG1655 | <i>F<sup>-</sup> <math>\lambda</math> <i>ilvG<sup>-</sup> rfb-50 rph-1</i></i> | (Blattner et al., 1997) |
| N3793  | AB1157 <i><math>\Delta</math>recG263::kan</i>                                  | (Mahdi et al., 1996)    |

| Primers    | 5' - 3'                             |                          |
|------------|-------------------------------------|--------------------------|
| 2DEcoRI-F1 | AAAAAGTCGACAAACAAGCAGCGCACATTC      | This work                |
| 2DEcoRI-R1 | ATCGGAGGGGAATTCATTTTGTCCGAGTCGTGAGG | This work                |
| 2DEcoRI-F2 | GGACAAAATGAATTCCTCCGATGATAGTTTTCG   | This work                |
| 2DEcoRI-R2 | AAAAACTGCAGCTGTCCGTAACCCTCTTTGC     | This work                |
| DigLacZF   | CTGGCGTAATAGCGAAGAGG                | This work                |
| DigLacZR   | CATGACCTGACCATGCAGAG                | This work                |
| DigLacIF   | GAAAACGCGGGAAAAAGTG                 | This work                |
| DigLacIR   | GCATTAATGAATCGGCCAAC                | This work                |
| Ex-Test-F  | TTATGCTTCCGGCTCGTATG                | (Eykelboom et al., 2008) |
| Ex-Test-R  | GGCGATTAAGTTGGGTAACG                | (Eykelboom et al., 2008) |
| lac-SF1    | AGTGGGATACGACGATACCG                | This work                |
| pal-CF2    | ATACCCAGATTGCGAACACC                | This work                |
| pal-CR1    | ACAACCTGACCCAGCAAAAG                | This work                |
| recB-KO-F1 | AAAAACTGCAGTACAAGGCGTTTTTCCCAAC     | This work                |
| recB-KO-R1 | ATCCATCAGGGCGCGCAAAGGATCTAGTGTCTCG  | This work                |
| recB-KO-F2 | GATCCTTTGCGCGCCCTGATGGATGAGATGTTTG  | This work                |
| recB-KO-R2 | AAAAAGTCGACCAATGGCATGATTCACCTTCG    | This work                |
| recD-KO-F1 | AAAAACTGCAGGTTAATCCGCCAGTTTGACC     | This work                |
| recD-KO-R1 | CAATTACGTTTATTTTATTACGCCTCCTCCAG    | This work                |
| recD-KO-F2 | GGCGTAATGAAATAAACGTAATTGCCGGATGC    | This work                |
| recD-KO-R2 | AAAAAGTCGACGGAGCAGCAAGGTATTCTGG     | This work                |
| ruvC-KO-F1 | AAAAACTGCAGATGGTTCCGTTGCCTATCTG     | This work                |
| ruvC-KO-R1 | TCGCATTCTGACTAATAGCCATCACGCGTCTC    | This work                |
| ruvC-KO-F2 | TGATGGCTATTAGTCAGAATGCGATGCAGATG    | This work                |
| ruvC-KO-R2 | AAAAAGTCGACGGCTGACAGAACGACAAAAAC    | This work                |
| sbcB-KO-F1 | AAAAACTGCAGAACCCGTCATCAGCTTTGTC     | This work                |

|            |                                                           |                         |
|------------|-----------------------------------------------------------|-------------------------|
| sbcB-KO-R1 | <b>CCGCGTACTGCCATTGTTGCTTACCGTCATTCATC</b>                | This work               |
| sbcB-KO-F2 | <b>GTAAGCAACAATGGCAGTACGCGGAAGAGATTG</b>                  | This work               |
| sbcB-KO-R2 | AAAAAGTCGACGCTGGATTGGCCTTGTATTT                           | This work               |
| seq-SR1    | GTGCTGCAAGGCATTAAGT                                       | This work               |
| TetO-CF1   | AAAAAGCTAGCAAATATCTGCCGACCAAACC                           | (White et al.,<br>2008) |
| TetO-CR2   | AAAAACTGCAGCCCAGACCTAACCCACACAC                           | (White et al.,<br>2008) |
| yaiO1      | AAAAACTGCAGCGAATTATTTCCCCGAACAC                           | This work               |
| yaiO2      | <b><u>ATTACCCTGTTATCCCTA</u></b> TTATCCGCAAAGGCAAT<br>ACC | This work               |
| yaiO3      | <b><u>TAGGGATAACAGGGTAAT</u></b> TACGCCGGTCTTTGCCC<br>G   | This work               |
| yaiO4      | AAAAAGTCGACTCAGTCAGCGGTTGAATACG                           | This work               |

---

**Table S1: Quantification of chromosomal rearrangements following induction of DSBs (related to Figure 6).** Percentage of cells for each combination of YFP/CFP foci per cell. Cells containing other combination of foci than the ones indicated in this table were not found in the studied population. Three independent experiments (Exp. 1, Exp. 2 and Exp. 3) were performed to study a total of 1,300 cells by strain. The means of these experiments are indicated followed by 95% confidence intervals (Mean  $\pm$  95%) and p-values calculated by two-sample t-test (using Minitab). p-values  $\leq 0.05$  were deemed to be statistically significant (indicated in bold) and could not be calculated when the three experiments performed on one strain had 0% of the tested YFP/CFP combination (nd). The strains used for the analysis were the *sbcDC recA* mutant containing the arabinose inducible I-SceI system, the I-SceI restriction site 15kb away from *lacZ* on the origin-distal side and the *tetO* and *lacO* arrays surrounding *lacZ* (DL4204) carrying the plasmid pDL3196 (No pal) and the *sbcDC recA* mutant containing the arabinose inducible I-SceI system, the I-SceI restriction site 15kb away from the 246bp palindrome on the origin-distal side and the *tetO* and *lacO* arrays surrounding the palindrome (DL4206) carrying the plasmid pDL3196 (Pal246).

**Table S1.**

|               | YFP      | CFP      | Exp. 1      | Exp. 2      | Exp. 3      | Mean $\pm$ 95%                    | p-value      |
|---------------|----------|----------|-------------|-------------|-------------|-----------------------------------|--------------|
| No pal        | 0        | 0        | 27          | 41.55       | 41.67       | $36.74 \pm 20.95$                 | 0.089        |
| Pal246        | 0        | 0        | 17.59       | 22.22       | 27.9        | $22.57 \pm 12.82$                 |              |
| No pal        | 0        | 1        | 0.87        | 0.44        | 0           | $0.44 \pm 1.08$                   | 0.893        |
| Pal246        | 0        | 1        | 0.87        | 0.22        | 0.36        | $0.48 \pm 0.85$                   |              |
| No pal        | 0        | 2        | 0           | 0           | 0           | $0 \pm 0$                         | nd           |
| Pal246        | 0        | 2        | 0.35        | 0           | 0.36        | $0.23 \pm 0.51$                   |              |
| <b>No pal</b> | <b>1</b> | <b>0</b> | <b>0.87</b> | <b>0.67</b> | <b>0.36</b> | <b><math>0.63 \pm 0.63</math></b> | <b>0</b>     |
| <b>Pal246</b> | <b>1</b> | <b>0</b> | <b>6.62</b> | <b>6.89</b> | <b>6.88</b> | <b><math>6.8 \pm 0.38</math></b>  |              |
| No pal        | 1        | 1        | 24.04       | 29.33       | 23.91       | $25.76 \pm 7.68$                  | 0.127        |
| Pal246        | 1        | 1        | 21.25       | 20.44       | 21.74       | $21.15 \pm 1.62$                  |              |
| No pal        | 1        | 2        | 0.52        | 0.67        | 0.72        | $0.64 \pm 0.26$                   | 0.913        |
| Pal246        | 1        | 2        | 0           | 1.33        | 0.72        | $0.69 \pm 1.66$                   |              |
| <b>No pal</b> | <b>2</b> | <b>0</b> | <b>0</b>    | <b>0.67</b> | <b>0</b>    | <b><math>0.22 \pm 0.96</math></b> | <b>0.049</b> |
| <b>Pal246</b> | <b>2</b> | <b>0</b> | <b>2.44</b> | <b>4</b>    | <b>2.17</b> | <b><math>2.87 \pm 2.45</math></b> |              |
| <b>No pal</b> | <b>2</b> | <b>1</b> | <b>1.57</b> | <b>0.44</b> | <b>1.81</b> | <b><math>1.27 \pm 1.81</math></b> | <b>0.011</b> |
| <b>Pal246</b> | <b>2</b> | <b>1</b> | <b>4.88</b> | <b>7.56</b> | <b>6.16</b> | <b><math>6.2 \pm 3.33</math></b>  |              |
| No pal        | 2        | 2        | 41.46       | 24.22       | 28.26       | $31.31 \pm 22.4$                  | 0.582        |
| Pal246        | 2        | 2        | 43.03       | 32.89       | 30.07       | $35.33 \pm 16.93$                 |              |
| No pal        | 2        | 4        | 0           | 0.22        | 0           | $0.07 \pm 0.32$                   | nd           |
| Pal246        | 2        | 4        | 0           | 0           | 0           | $0 \pm 0$                         |              |
| No pal        | 3        | 1        | 0           | 0           | 0           | $0 \pm 0$                         | nd           |
| Pal246        | 3        | 1        | 0.17        | 0.67        | 0.36        | $0.4 \pm 0.61$                    |              |
| No pal        | 3        | 2        | 0           | 0.67        | 1.09        | $0.58 \pm 1.36$                   | 0.781        |
| Pal246        | 3        | 2        | 0.35        | 0.67        | 1.09        | $0.7 \pm 0.92$                    |              |
| No pal        | 3        | 3        | 2.79        | 0.67        | 0.36        | $1.27 \pm 3.28$                   | 0.702        |
| Pal246        | 3        | 3        | 0.87        | 2.22        | 1.81        | $1.63 \pm 1.72$                   |              |
| No pal        | 4        | 2        | 0.17        | 0           | 0           | $0.06 \pm 0.25$                   | 0.387        |
| Pal246        | 4        | 2        | 0.17        | 0           | 0.36        | $0.18 \pm 0.45$                   |              |
| No pal        | 4        | 3        | 0           | 0           | 0.36        | $0.12 \pm 0.52$                   | nd           |
| Pal246        | 4        | 3        | 0           | 0           | 0           | $0$                               |              |
| No pal        | 4        | 4        | 0.7         | 0.44        | 0.14        | $0.86 \pm 1.3$                    | 0.852        |
| Pal246        | 4        | 4        | 1.4         | 0.89        | 0           | $0.76 \pm 1.75$                   |              |

## Supplemental References

Blattner, F.R., Plunkett, G.3., Bloch, C.A., Perna, N.T., Burland, V., Riley, M., Collado-Vides, J., Glasner, J.D., Rode, C.K., Mayhew, G.F. et al. (1997). The complete genome sequence of *Escherichia coli* K-12. *Science*. 277, 1453-1474.

Darmon, E., Lopez-Vernaza, M.A., Helness, A.C., Borking, A., Wilson, E., Thacker, Z., Wardrope, L., and Leach, D.R. (2007). SbcCD regulation and localization in *Escherichia coli*. *J.Bacteriol.* 189, 6686-6694.

Khlebnikov, A., Datsenko, K.A., Skaug, T., Wanner, B.L., and Keasling, J.D. (2001). Homogeneous expression of the P(BAD) promoter in *Escherichia coli* by constitutive expression of the low-affinity high-capacity AraE transporter. *Microbiology*. 147, 3241-3247.

Mahdi, A.A., Sharples, G.J., Mandal, T.N., and Lloyd, R.G. (1996). Holliday junction resolvases encoded by homologous *rusA* genes in *Escherichia coli* K-12 and phage 82. *J.Mol.Biol.* 257, 561-573.

Merlin, C., McAteer, S., and Masters, M. (2002). Tools for characterization of *Escherichia coli* genes of unknown function. *J.Bacteriol.* 184, 4573-4581.

Miller J.H. (1992). A short course in bacterial genetics (New York: Cold Spring Harbor Laboratory Press).

Pinder, D.J., Blake, C.E., Lindsey, J.C., and Leach, D.R. (1998). Replication strand preference for deletions associated with DNA palindromes. *Mol.Microbiol.* 28, 719-727.

Wertman, K.F., Wyman, A.R., and Botstein, D. (1986). Host/vector interactions which affect the viability of recombinant phage lambda clones. *Gene*. 49, 253-262.

Zahra, R., Blackwood, J.K., Sales, J., and Leach, D.R. (2007). Proofreading and secondary structure processing determine the orientation dependence of CAG x CTG trinucleotide repeat instability in *Escherichia coli*. *Genetics*. 176, 27-41.
